# Supplementary material for: Targeted delivery of “copper carbonate” nanoparticles to cancer cells in vivo
Source: Royal Society of Chemistry journal article supplement (doi:10.1039/c5tx00212e), 2015-01-01
Supplement: c5tx00212e1.pdf [file c5tx00212e1.pdf]

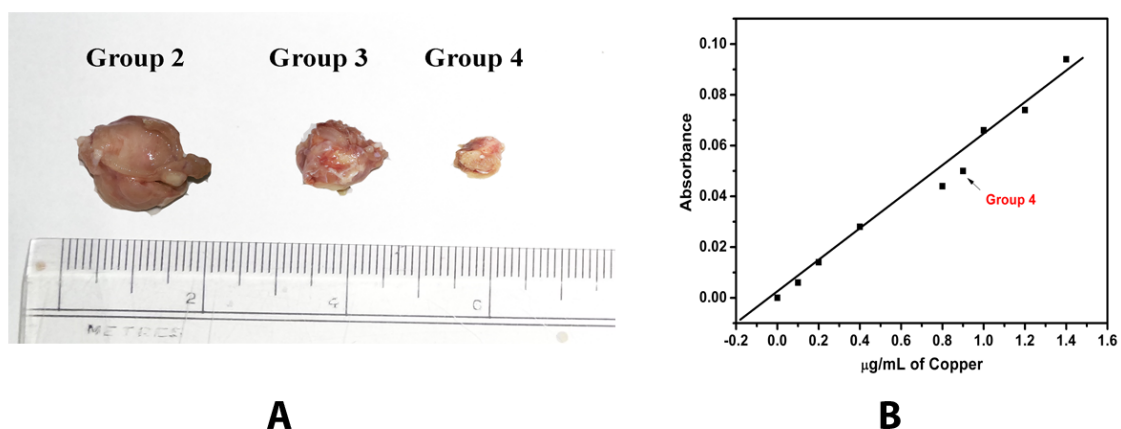

Supplementary Figure 1. (A) Solid tumor of Group 2, 3 & 4 mice. (B) Atomic absorption spectrophotometer data for quantification of copper content ( $\mu\text{g/ml}$ ) in serum of group 4 mice.
